# Supplementary material
Source: Springer Nature journal article supplement (https://www.springermedizin.de/resource/supplementary/12916_2011_523_MOESM1_ESM.pdf/9598052)

# NORMALS

Minimal inflammation  
Short-lived, upper respiratory symptoms only

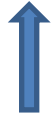

Robust antiviral responses  
Minimal inflammatory response

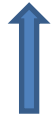

↑IFN- $\gamma$

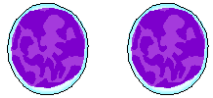

Strong NK cell and  
Th1 cell responses

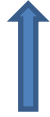

Up-regulation of  
interferon-  
stimulated genes

Robust interferon  
responses

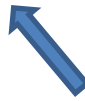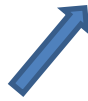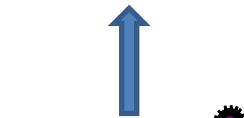

Virus infection of  
epithelial cells

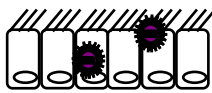

# ASTHMATICS

EXACERBATION

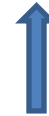

Cell necrosis  
Excessive inflammatory  
response

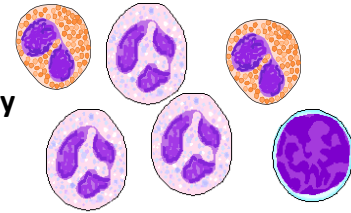

Uncontrolled viral  
replication

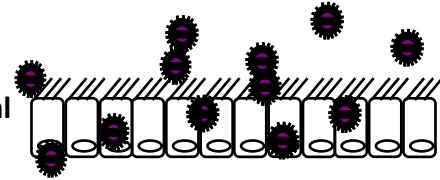

Impaired interferon  
responses

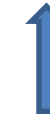

Predominant Th2 cells  
↓IFN- $\gamma$

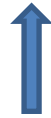

Virus infection of  
epithelial cells

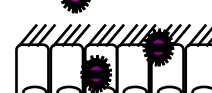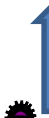

Supplement: MOESM1 [file 9598052]
